# Supplementary material
Source: PubMed Central journal article supplement (PMC8542600)
Supplement: NIHMS1739861-supplement-1.pdf [file NIHMS1739861-supplement-1.pdf]

# Supporting Information

## Emergence of Non-Hexagonal Crystal Packing of Deswollen and Deformed Ultra-Soft Microgels Under Osmotic Pressure Control

Dr. Molla R. Islam  
Schmid College of Science and Technology  
Chapman University  
Orange, CA 92780 USA

Rachel Nguyen  
Schmid College of Science and Technology  
Chapman University  
Orange, CA 92780 USA

Prof. L. Andrew Lyon\*  
Dale E. and Sarah Ann Fowler School of Engineering  
Chapman University, Orange, CA 92866 USA  
E-mail: lyon@chapman.edu

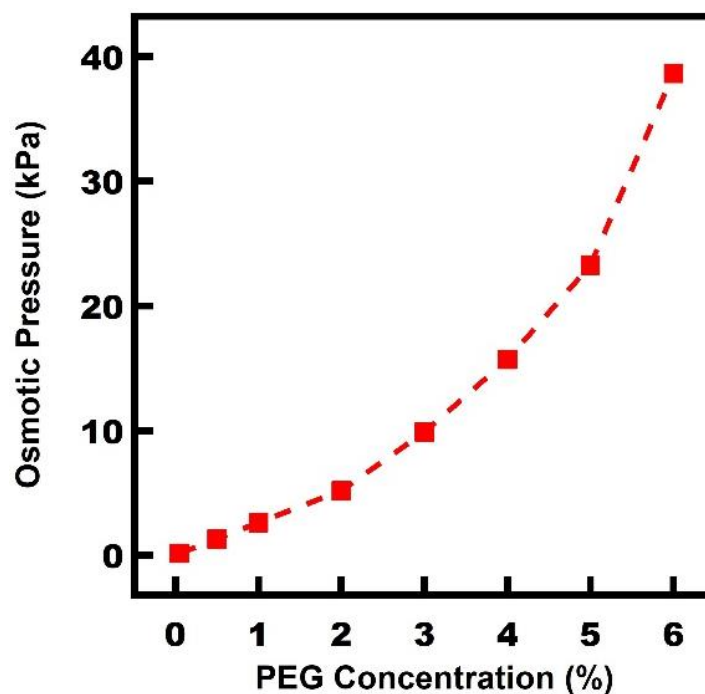

**Figure S1.** Plot of osmotic pressure vs. concentration of 20 kDa PEG in water. Reproduced with permission.<sup>[12, 21]</sup>
